# Supplementary material
Source: PubMed Central journal article supplement (PMC4187876)
Supplement: IAI.01576-14_zii999090878so2.pdf [file IAI.01576-14_zii999090878so2.pdf]

## Supplementary Legends

### **Fig. S1 Expression analysis of *esx* deletion mutants and growth curves.**

**A.** Expression analysis of *esxA* and *esxB* genes in USA300 WT strain and in different *esx* mutants by quantitative real-time PCR (qRT-PCR). Relative quantification was performed using 16S rRNA as internal control. **B.** Growth curve in TSB medium does not reveal any growth defects.

### **Fig. S2 *esxA* mutant induces more actin polymerization.**

**A.** Confocal microscopy of A549 cells infected by the WT and the *esx* mutant strains  $\Delta esxA$  and  $\Delta esxB$  4h *p.i.* Vancomycin-Bodipy-FL stains *S. aureus* wall, while phalloidin stains F-actin. Polymerized actin (condensed form) can be observed as brightly stained cell membranes on rounded cells (white arrows). **B.** The graph shows quantitation of rounded infected cells with cell membranes bearing polymerized actin for the WT and *esx* mutant-infected cells. Data are representative of 3 independent experiments. \* indicates significant differences, one way ANOVA, Tukey's multiple comparisons test  $P < 0.05$ .

### **Fig. S3 Flow cytometry analysis of A549 cells transfected with truncated *esxA***

24h post transfection cells were dissociated and then stained with Aqua Live-Dead and Annexin V-APC. The percentage of apoptotic cells (early and late apoptotic cells) was measured in the subpopulation bearing EYFP, *i.e.* transfected cells. Data are shown as a percentage of cells transfected with the control vector. Data are from one representative experiment.

### **Fig S4. FACS analysis of apoptosis after staurosporine treatment**

24h post transfection, A549 cells transfected with the plasmid *pesxA*-EYFP were treated with 2.5 mM staurosporine for 30 min, followed by AquaLive-Dead and Annexin V-APC staining. The percentage of apoptotic cells (early and late apoptotic cells) was measured in the subpopulation bearing EYFP, *i.e.* transfected cells. Representative flow cytometry scatter plots depicting the early apoptotic (bottom right quadrant), late apoptotic (top right quadrant) and dead cells (top left quadrant).

**Fig. S5  $\Delta$ *esxAB* mutant induces more apoptosis in epithelial cells compared to WT.**

Quantitation of apoptotic cells using flow cytometry for A549 cells infected by WT and  $\Delta$ *esxAB* strain at 6h *p.i.* Cells were stained with Aqua Live-Dead (1:500), and with Annexin V-FITC. Data are the mean of 3 independent experiments +/- s.d. \* indicates significant differences using a one tailed Mann Whitney test ( $P < 0.05$ ).

**Fig S6. Bacterial counts from supernatants from continuous infection assays**

Bacterial counts from cell culture supernatants of cells infected with WT or  $\Delta$ *esxAB* at 7.5h *p.i.* in the absence of lysostaphin, as described in Methods.

**Fig. S7. Hemolysin expression in *esx* deletion mutants**

**A.** After overnight culture of WT and *esx* mutants, 5  $\mu$ l of culture were spotted on the blood agar plates and incubated for 24h. Equal zones of hemolysis were observed for the WT and mutant strains. **B.** Immunoblotting analysis of bacterial supernatants. Proteins were precipitated with TCA, separated on SDS-PAGE, and detected by immunoblotting with anti- $\alpha$ -hemolysin.
