# Supplementary material
Source: PubMed Central journal article supplement (PMC4187876)

Fig. S1

A

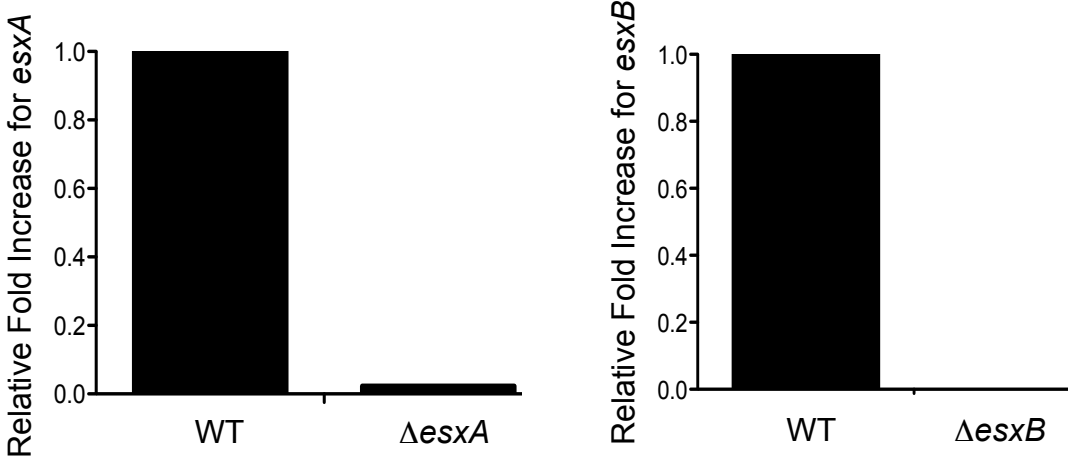

B

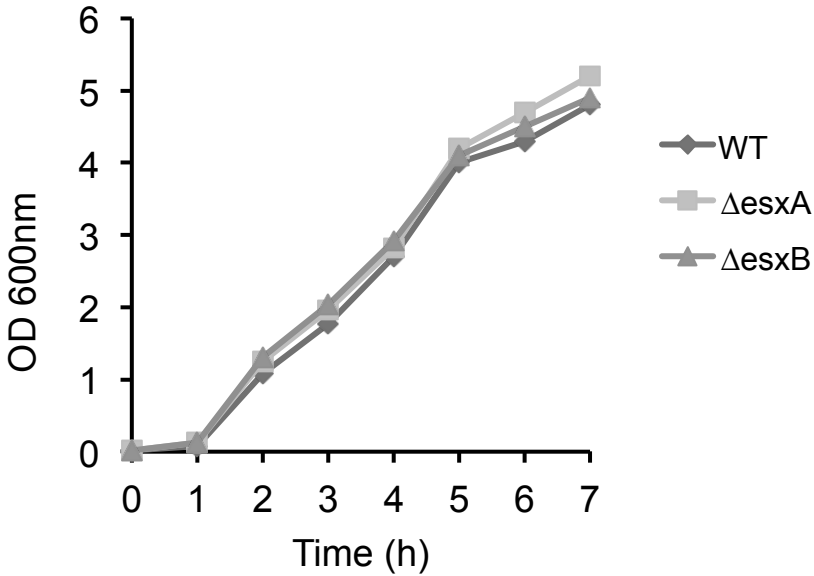

Fig. S2

A

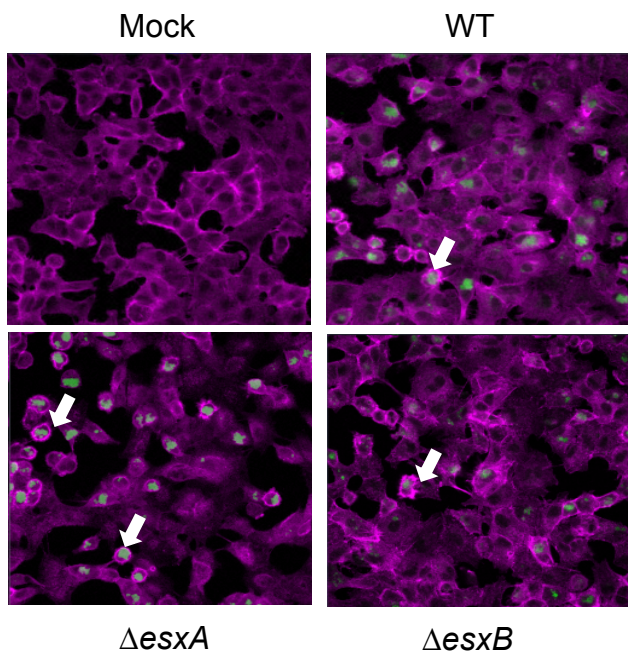

B

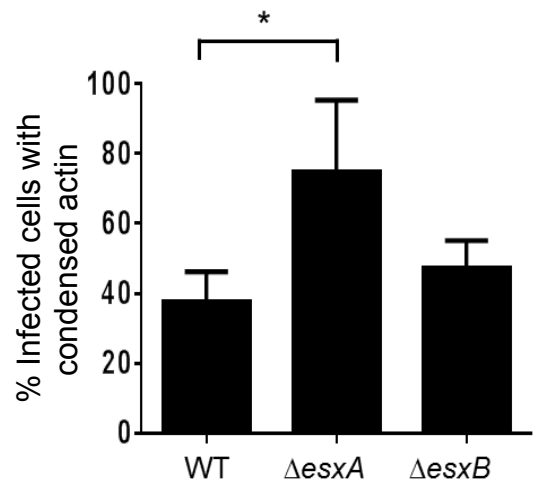

Fig. S3

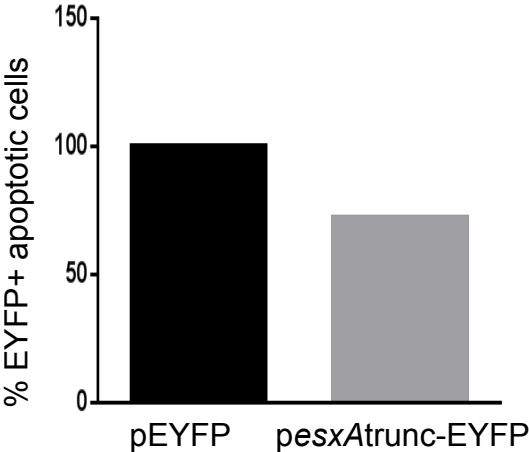

Fig. S4

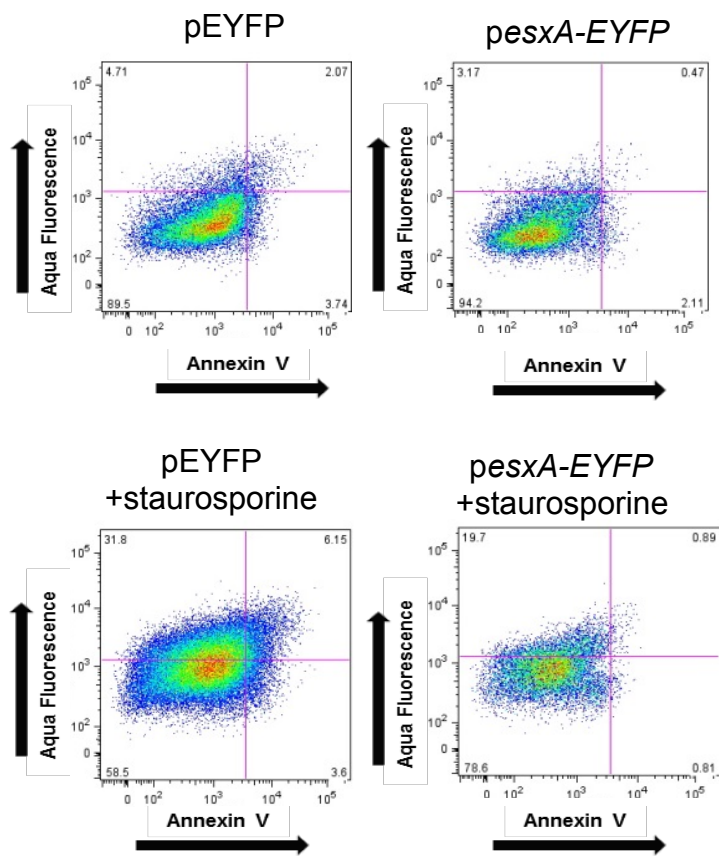

Fig. S5

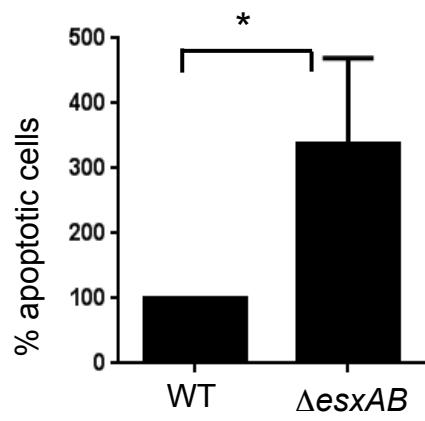

Fig. S6

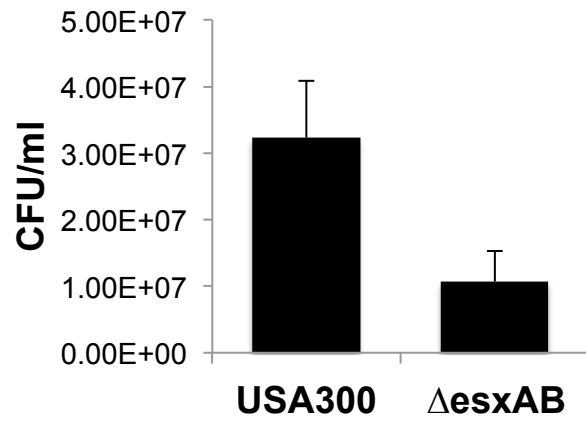

Fig. S7

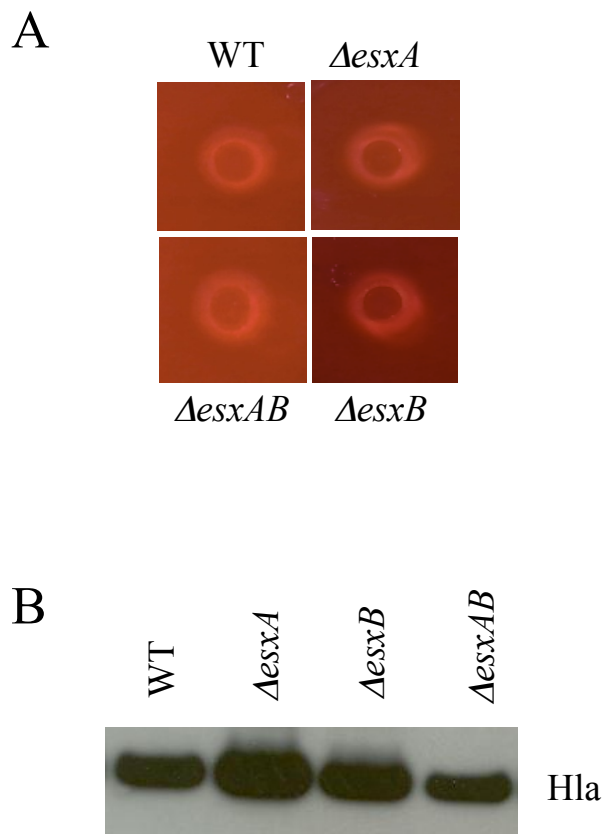

Supplement: IAI.01576-14_zii999090878so1.pdf [file IAI.01576-14_zii999090878so1.pdf]
